# Supplementary figures and images for: Opposing roles for DNA replication initiator proteins ORC1 and CDC6 in control of Cyclin E gene transcription
Source: eLife journal article supplement (doi:10.7554/elife.12785), 2016-07-26

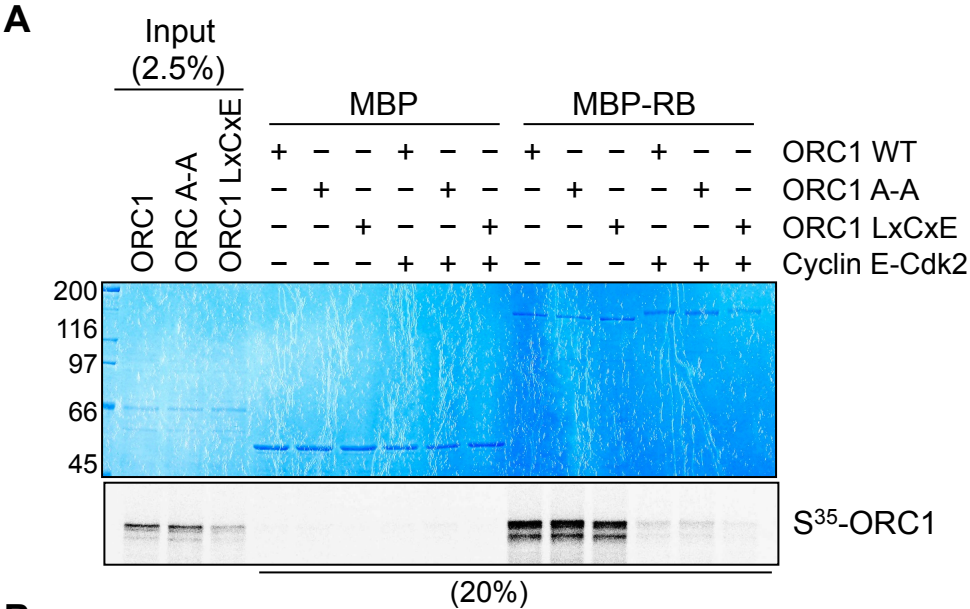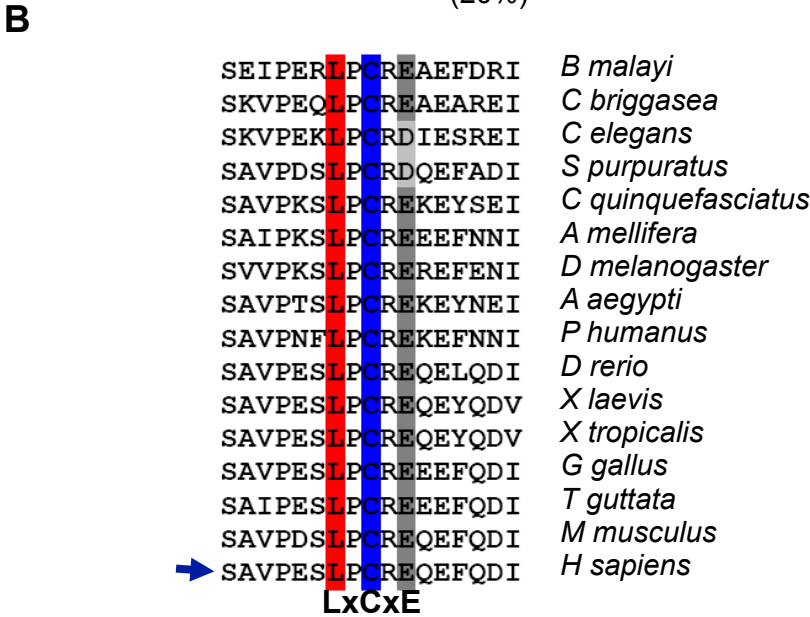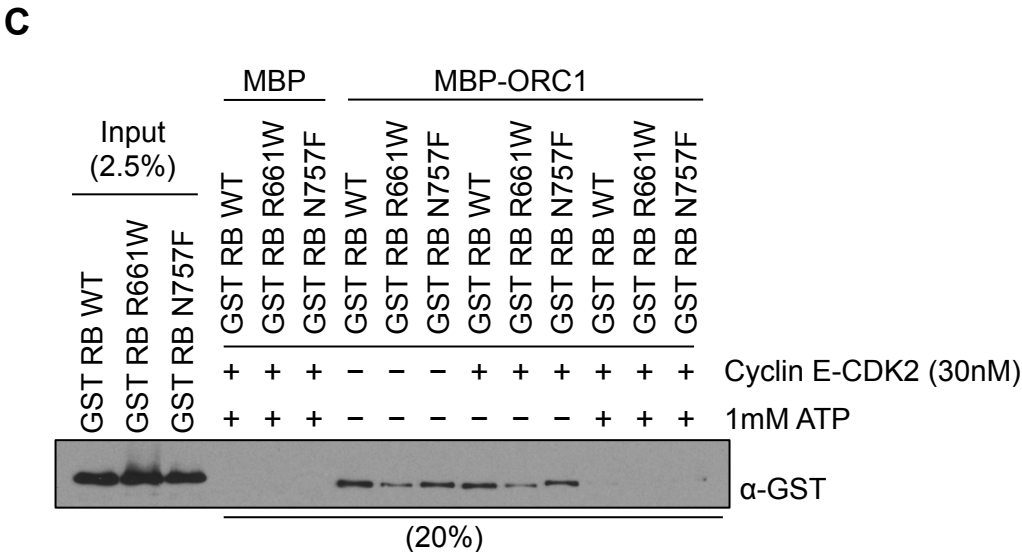

Supplement: supp [file elife-12785-supp-v1.zip]

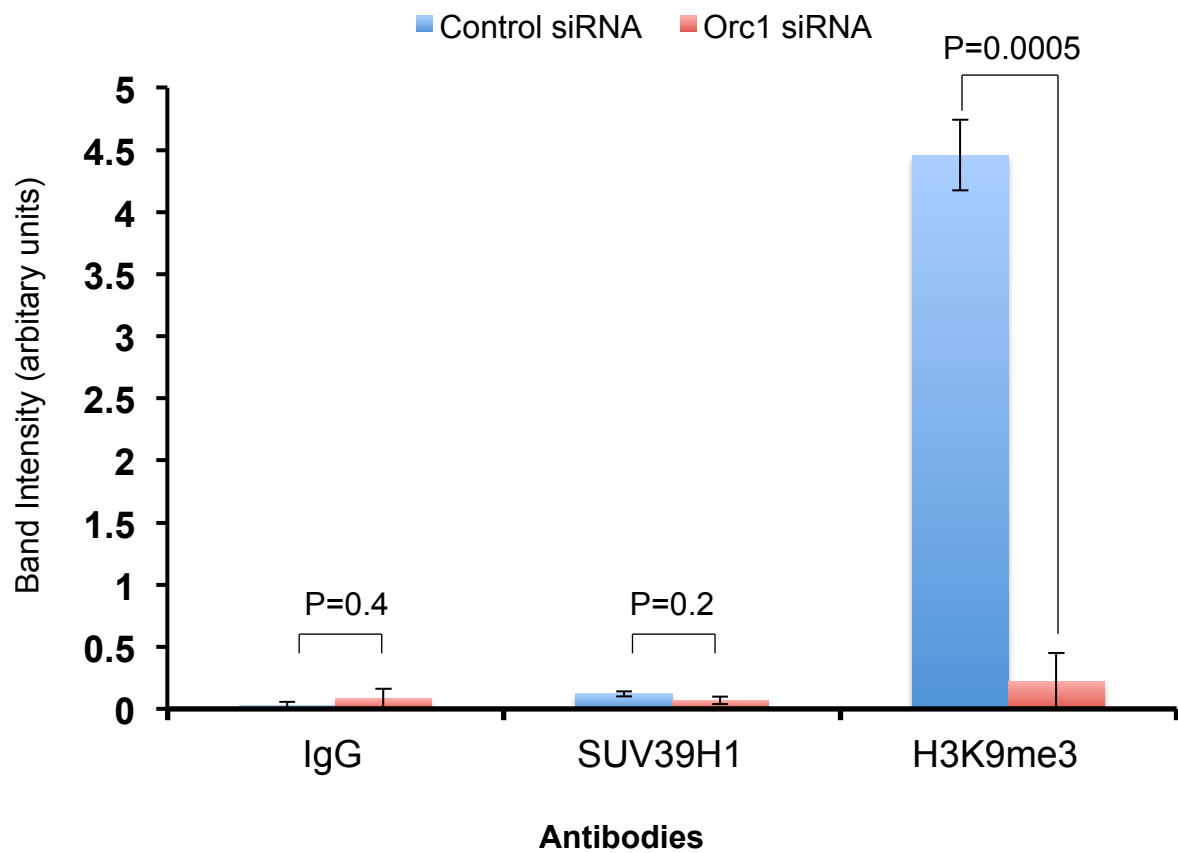

Supplement: supp [file elife-12785-supp-v1.zip]

**A**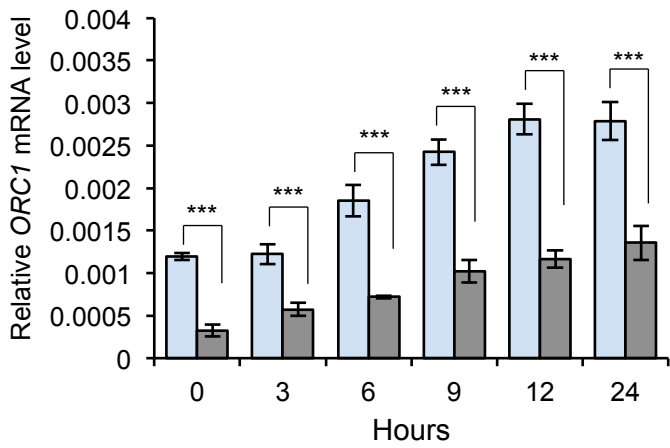**B**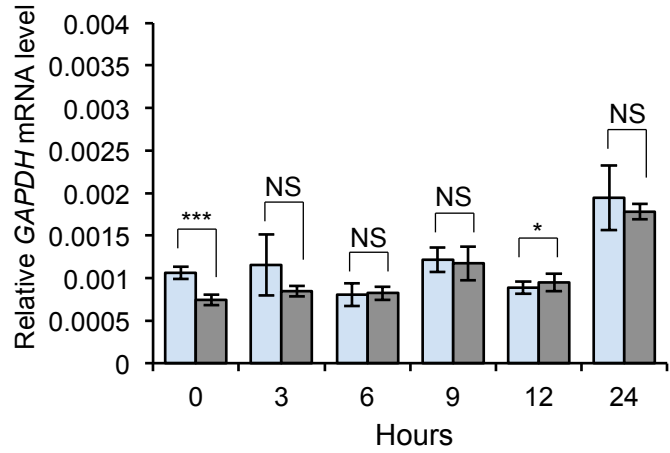**C**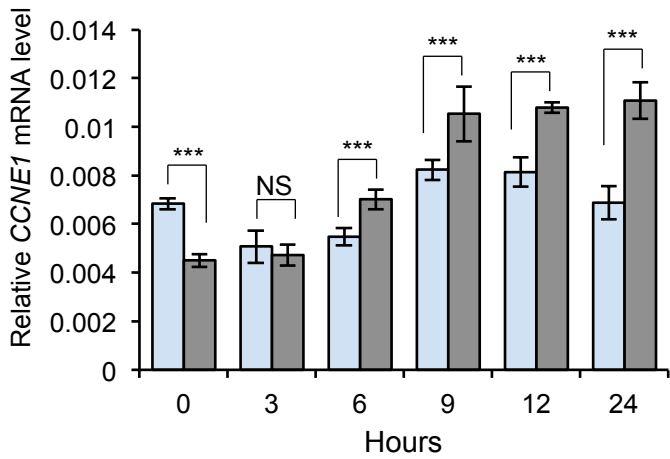**D**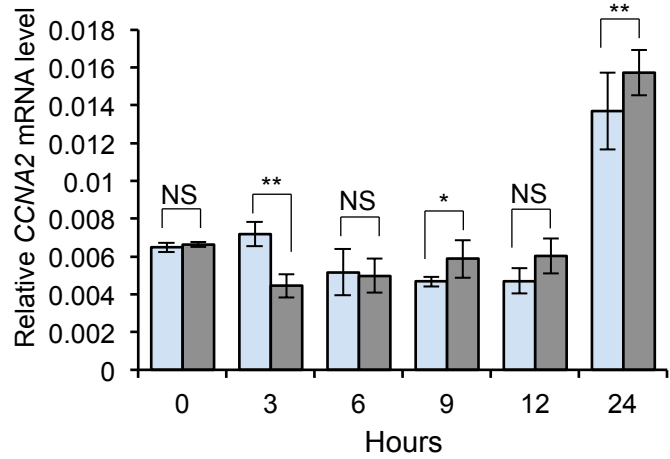

Supplement: supp [file elife-12785-supp-v1.zip]

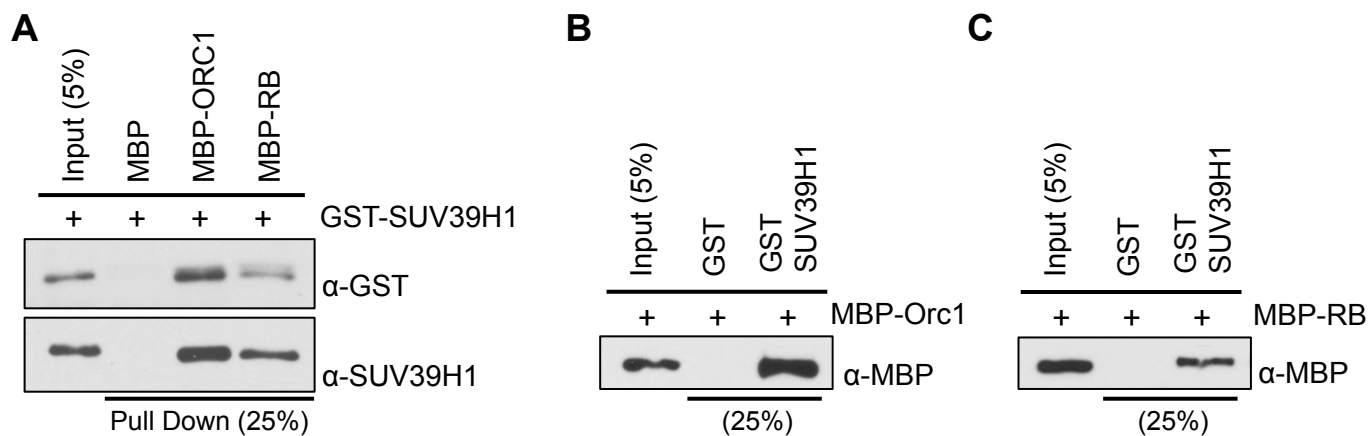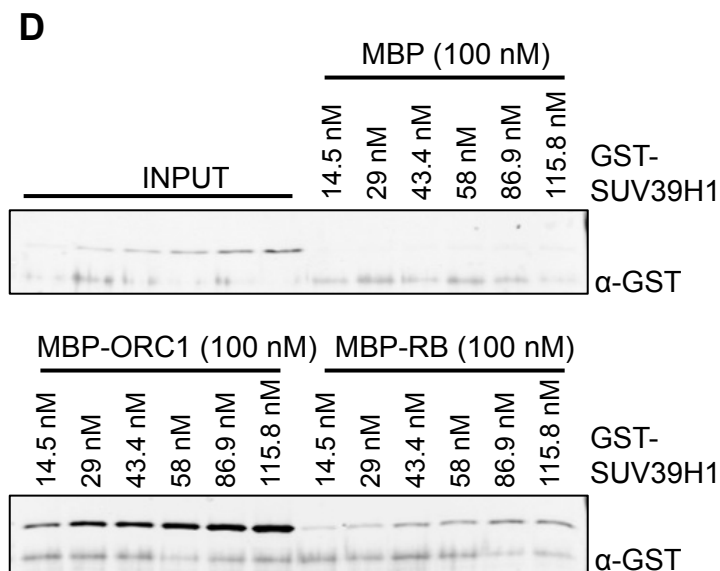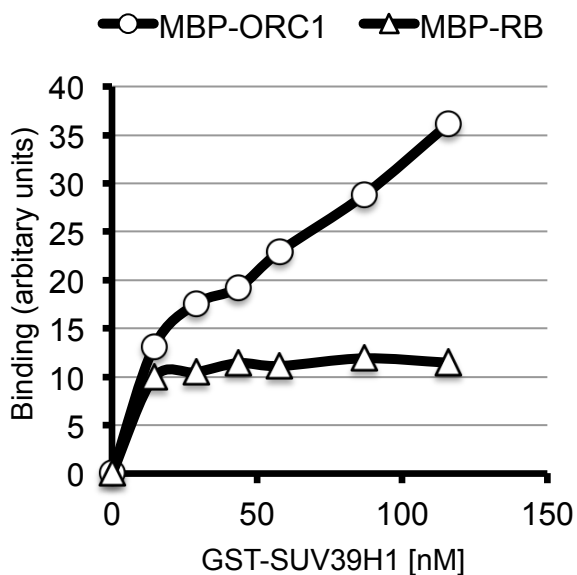

Supplement: supp [file elife-12785-supp-v1.zip]

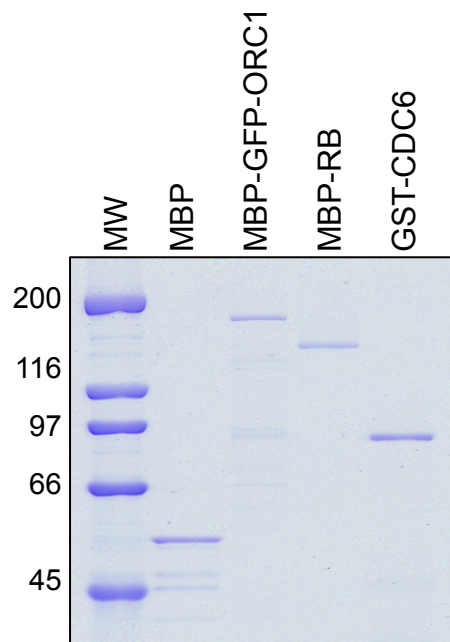

Supplement: supp [file elife-12785-supp-v1.zip]

**A**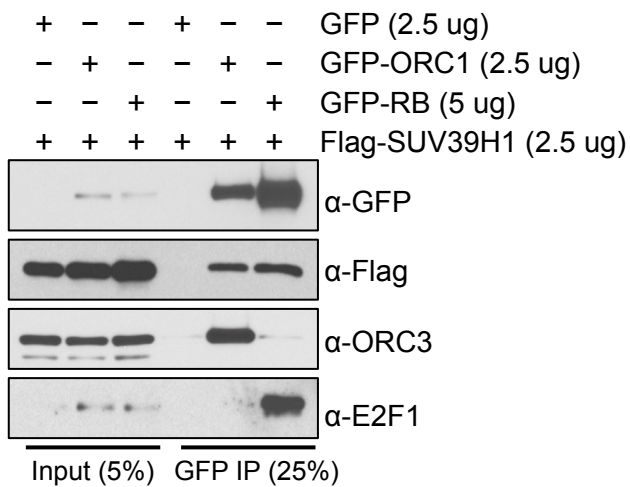**B**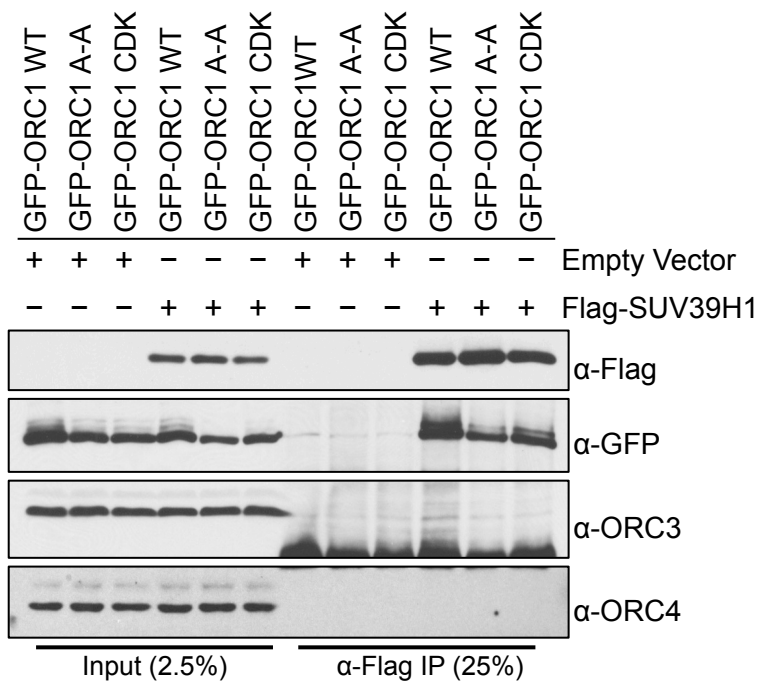**C**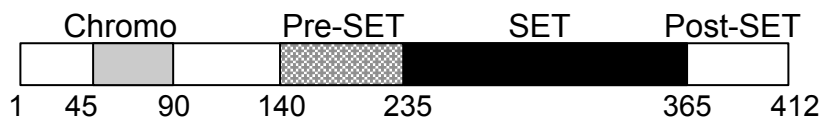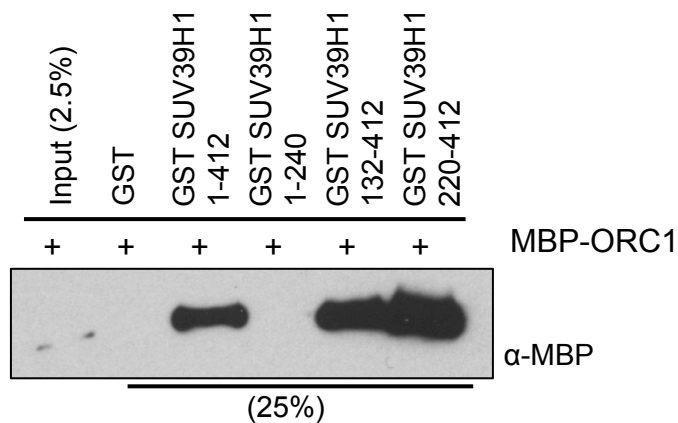

Supplement: supp [file elife-12785-supp-v1.zip]

**A**

— 6X GAL4 UAS — Luciferase

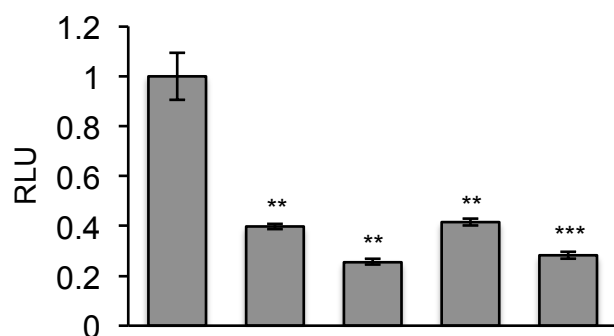

|                   |     |     |     |     |     |
|-------------------|-----|-----|-----|-----|-----|
| GAL4 (ug)         | 0.2 | -   | -   | -   | -   |
| GAL4-ORC1 (ug)    | -   | 0.1 | 0.2 | -   | -   |
| GAL4-SUV39H1 (ug) | -   | -   | -   | 0.1 | 0.2 |
|                   | 1   | 2   | 3   | 4   | 5   |

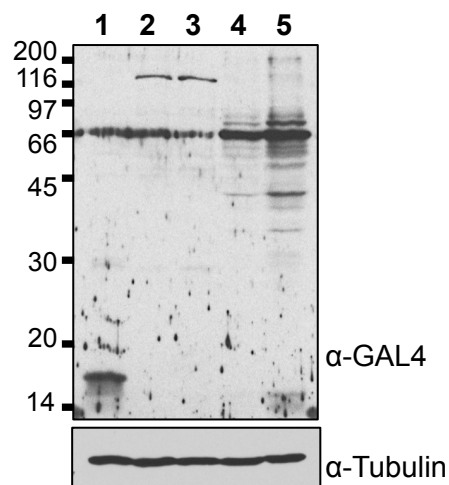**B**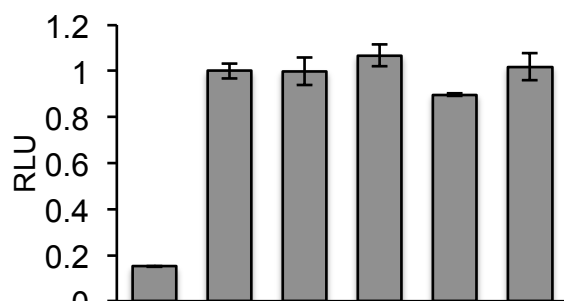

|                |   |   |     |     |     |     |
|----------------|---|---|-----|-----|-----|-----|
| E2F1/DP1       | - | + | +   | +   | +   | +   |
| ORC3-Flag (ug) | - | - | 0.5 | 1.0 | -   | -   |
| ORC4-Flag (ug) | - | - | -   | -   | 0.5 | 1.0 |

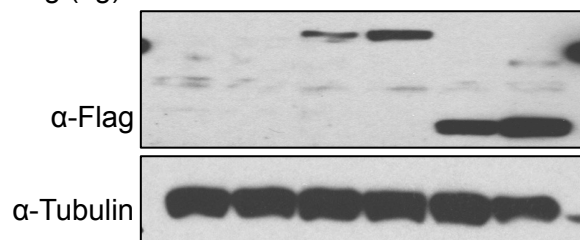

Supplement: supp [file elife-12785-supp-v1.zip]

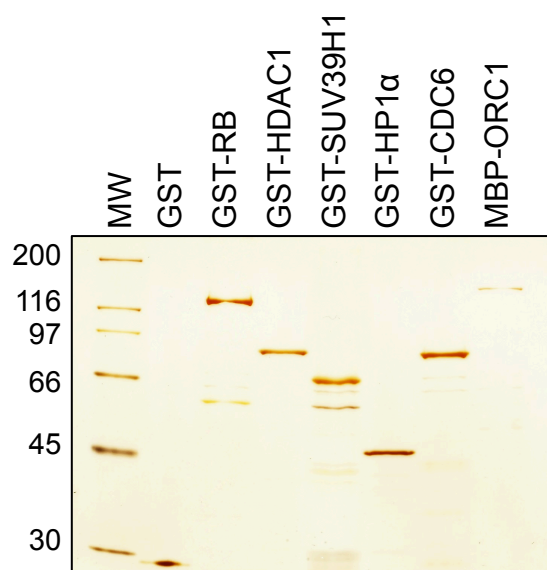

Supplement: supp [file elife-12785-supp-v1.zip]
